# Supplementary material for: Estimating aerosol emission from SPEXone on the NASA PACE mission using an ensemble Kalman smoother: observing system simulation experiments (OSSEs)
Source: Copernicus journal article supplement (doi:10.5194/gmd-15-3253-2022), 2022-04-21
Supplement: Supplementary file 1 [file gmd-15-3253-2022-supplement.pdf]

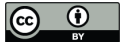

*Supplement of*

**Estimating aerosol emission from SPEXone on the NASA PACE mission using an ensemble Kalman smoother: observing system simulation experiments (OSSEs)**

**Athanasios Tsikerdekis et al.**

*Correspondence to:* Athanasios Tsikerdekis (a.tsikerdekis@sron.nl)

The copyright of individual parts of the supplement might differ from the article licence.

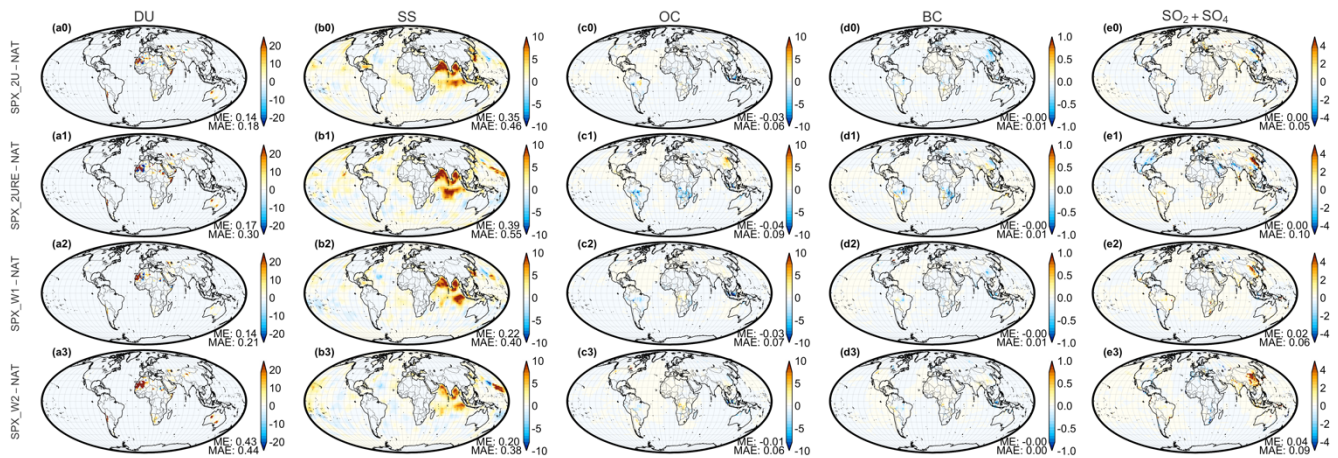

**FigureS 1.** Aerosol emission (kg km<sup>-2</sup> day<sup>-1</sup>) differences of three data assimilation experiments from NAT for various species (a) DU, (b) SS, (c) OC, (d) BC, (e) SO<sub>2</sub>+SO<sub>4</sub>. The subplots of the first, second and third row depict the differences between SPX\_2U – NAT, SPX\_2URE – NAT, SPX\_W1 – NAT and SPX\_W2 – NAT respectively.

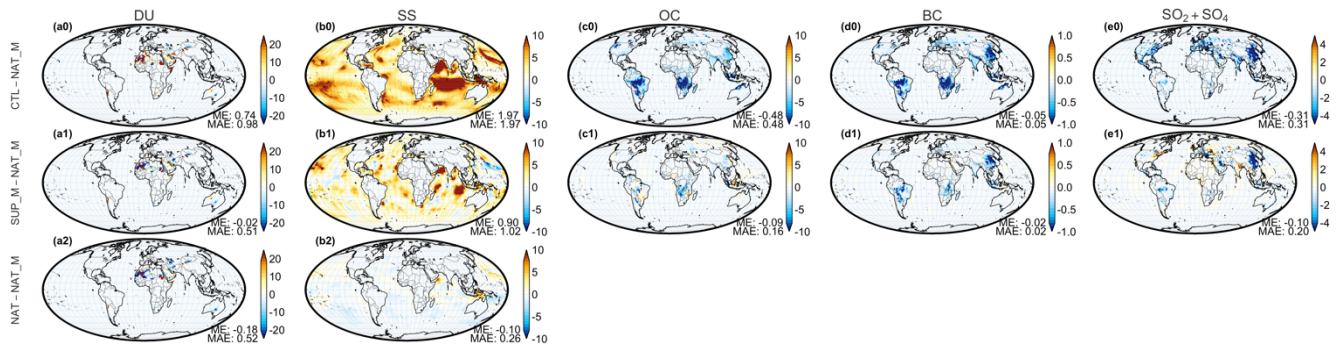

**FigureS 2.** Aerosol emission (kg km<sup>-2</sup> day<sup>-1</sup>) differences by species (a) DU, (b) SS, (c) OC, (d) BC, (e) SO<sub>2</sub>+SO<sub>4</sub>. The subplots of the first, second and third row depict the differences between CTL – NAT\_M, SUP – NAT\_M and NAT – NAT\_M (ERA-5 – ERA-I) respectively. Note that the differences of the last row indicates changes in aerosol emissions only due to different meteorology, hence only the emissions of DU and SS are different, since the emissions of other species are not dependent on meteorological parameters.

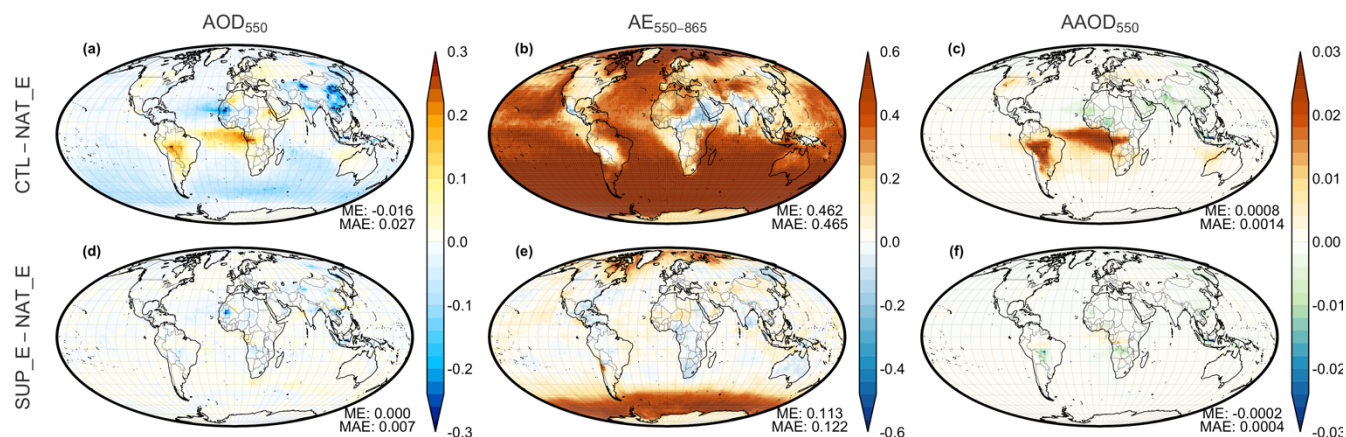

**FigureS 3.** Aerosol optical properties differences of SUP\_E1 – NAT\_M (a,b,c) and SUP\_E2 – NAT\_M (d,e,f). Left column depict AOD (a,d), middle column AE (b,e) and right column AAOD (c,f). PER\_E1 emissions are perturbed by species, while PER\_E2

emissions are perturbed by species and by size mode for DU and SS. PER\_E (discussed in the main paper) is the succeeding experiment where emission perturbations were perturbed by species and by size mode for DU and SS, while prior correction was also enabled.

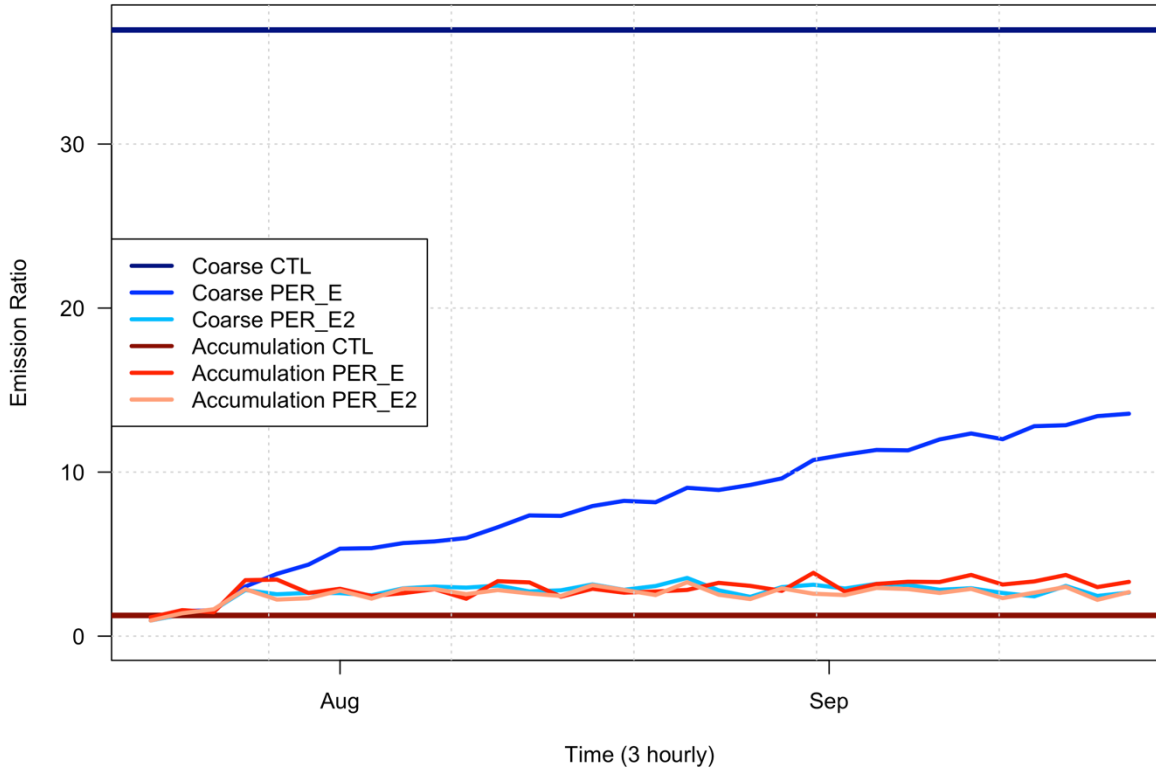

FigureS 4. Timeseries of sea salt emission ratio NAT\_E to CTL over high latitudes in the southern hemisphere ( $< -55^\circ$ ). Coarse and accumulation mode are shown with the dark-blue and the dark-red bold horizontal lines. The perturbations used for the coarse and the accumulation mode assimilation experiment SUP\_E and SUP\_E2 are shown with the fluctuating (in time) lines. SUP\_E2 is identical to SUP\_E with the difference that it doesn't use the prior correction option. Coarse mode perturbations for SUP\_E are slowly rising during the course of the experiment, although it needs more time to reach the very high SS coarse emission of NAT\_E which are 36 times greater than CTL. At the same time accumulation mode perturbations remain low and prior correction option does not affect negatively their estimation.

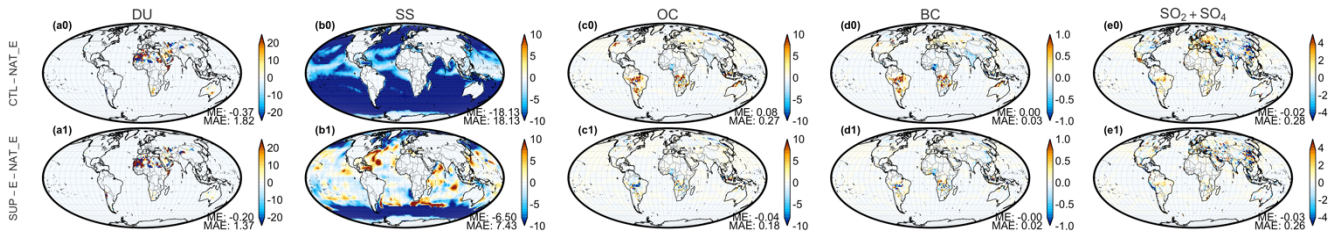

FigureS 5. Aerosol emission ( $\text{kg km}^{-2} \text{ day}^{-1}$ ) differences of two data assimilation experiments from NAT\_E for various species (a) DU, (b) SS, (c) OC, (d) BC, (e)  $\text{SO}_2 + \text{SO}_4$ . The subplots of the first and the second row depict the differences between CTL - NAT\_E and SUP\_E - NAT\_E respectively.
